# Supplementary material
Source: Springer Nature journal article supplement (https://www.springermedizin.de/resource/supplementary/12936_2010_1381_MOESM4_ESM.pdf/9549666)

1999—2004

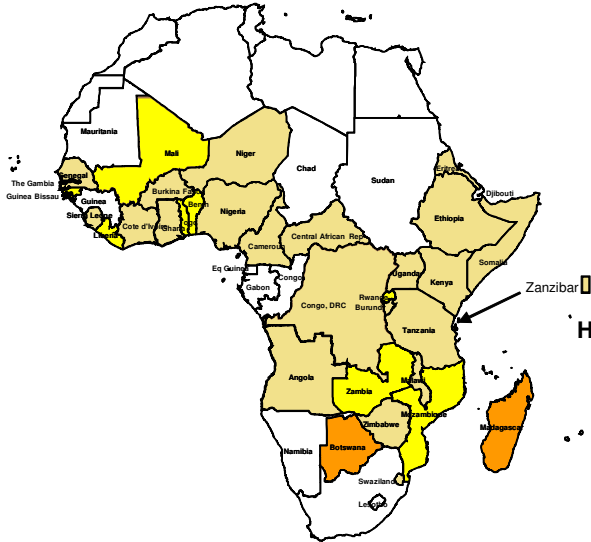

2005—2009

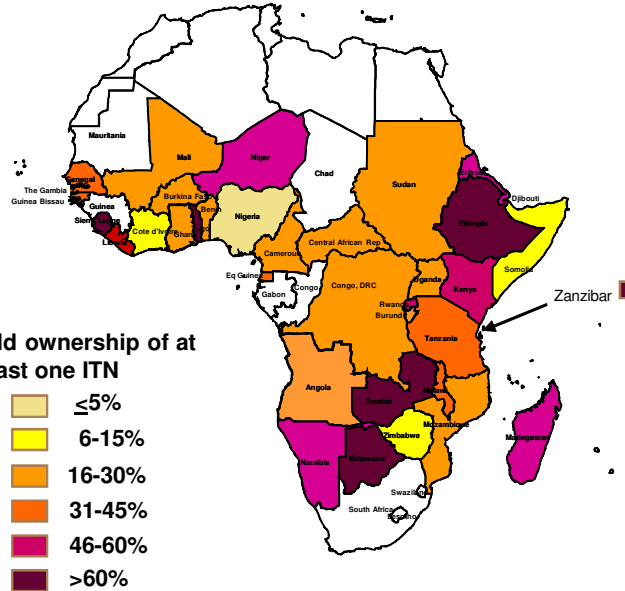

Household ownership of at least one ITN

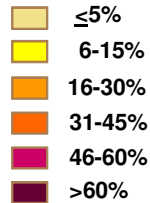

Supplement: MOESM4 [file 9549666]
